# Supplementary material for: Genome-wide identification of directed gene networks using large-scale population genomics data
Source: PubMed Central journal article supplement (PMC6079029; doi:10.1038/s41467-018-05452-6), 2018-08-06
Supplement: 41467_2018_5452_MOESM3_ESM.pdf [file 41467_2018_5452_MOESM3_ESM.pdf]

## Description of Additional Supplementary Files

**File Name: Supplementary Data 1**

**Description:** The number of samples used per biobank listed after quality control.

**File Name: Supplementary Data 2**

**Description:** The predictive ability of the genetic instrument per index gene. The predictive ability is reflected by the F-statistic.

**File Name: Supplementary Data 3**

**Description:** Directed associations between genes without correcting the analysis for LD and pleiotropy.

**File Name: Supplementary Data 4**

**Description:** *Cis*-eQTLs for those index genes that also show a *trans*-eQTL effect in a recent study.

**File Name: Supplementary Data 5**

**Description:** Directly testing for a mediated effect of the index gene genetic instrument (GI) on target gene expression, where the effect is mediated by index gene expression.

**File Name: Supplementary Data 6**

**Description:** Results of the enrichment tests using GO-terms. This dataset contains both the enrichment tests performed on the directed associations found without, and with correction for LD and pleiotropy.

**File Name: Supplementary Data 7**

**Description:** Index gene-target gene pairs identified in our data that are known from different studies.

**File Name: Supplementary Data 8**

**Description:** Directed associations between genes while correcting the analysis for LD and pleiotropy.
